# Supplementary material
Source: PubMed Central journal article supplement (PMC3715149)
Supplement: NIHMS439668-supplement-1_si_001.pdf [file NIHMS439668-supplement-1_si_001.pdf]

# Supporting Information (SI)

## Evidence of Oral Translocation of Anionic G6.5 Dendrimers in Mice

*Giridhar Thiagarajan<sup>‡, †</sup>, Shraddha Sadekar<sup>§, †</sup>, Khaled Greish<sup>§, †, 1</sup>, Abhijit Ray<sup>§, †</sup>, and  
Hamidreza Ghandehari<sup>§, ‡, †, \*</sup>*

<sup>‡</sup> Department of Bioengineering, <sup>§</sup> Department of Pharmaceutics and Pharmaceutical  
Chemistry, and <sup>†</sup> Utah Center for Nanomedicine, Nano Institute of Utah, University of  
Utah, Salt Lake City, Utah 84112, United States

<sup>1</sup>Present address: Department of Pharmacology & Toxicology, Otago School of Medical  
Sciences, University of Otago, Dunedin, New Zealand

Corresponding author: Hamidreza Ghandehari, Utah Center for Nanomedicine, Nano  
Institute of Utah, University of Utah, Salt Lake City, UT 84112, USA. Tel: +(001) 801  
587 1566. Fax: +(001) 801 585 0575. E-mail: [hamid.ghandehari@pharm.utah.edu](mailto:hamid.ghandehari@pharm.utah.edu)

### Supplementary Figure 1

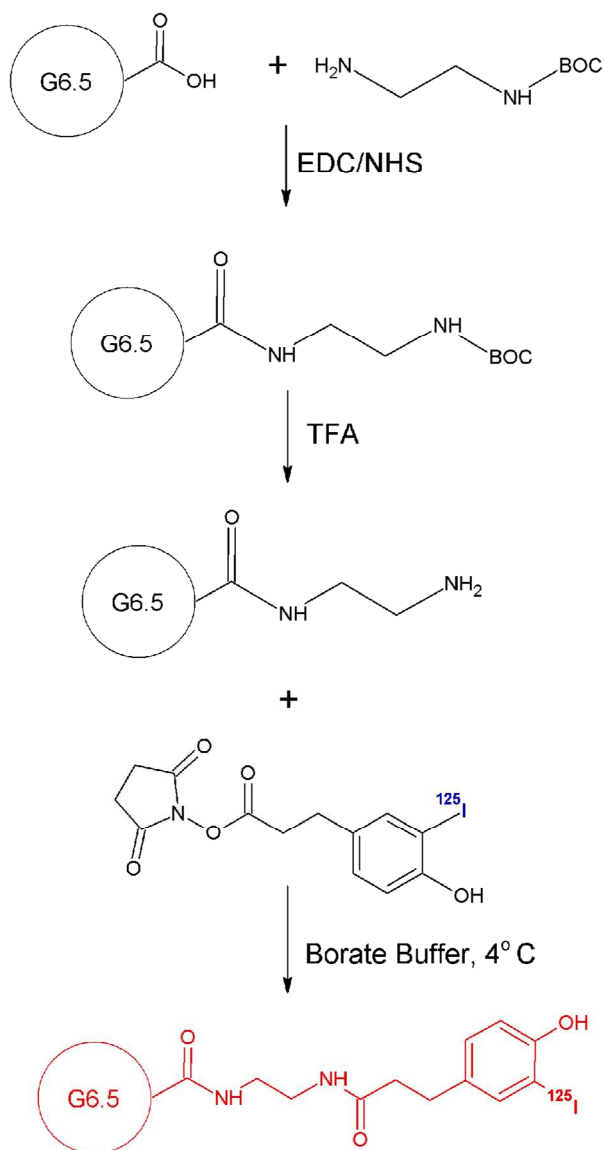

**SI – 1.** Scheme depicting the radiolabeling of anionic G6.5 PAMAM dendrimers. Anionic dendrimers were initially modified with ethylene diamine and then reacted with [<sup>125</sup>I] Bolton-Hunter reagent.

## Supplementary Figure 2

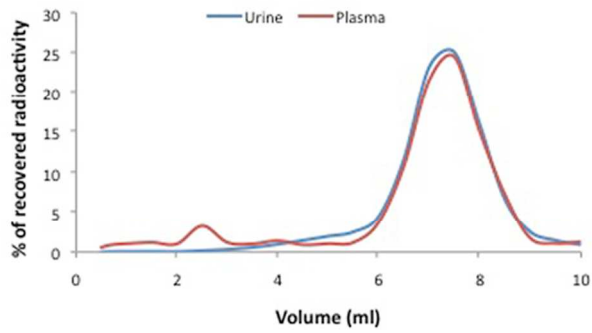

**SI – 2.** Control size exclusion experiments to validate PD-10 methods. Radioactivity profile from a PD-10 column loaded with <sup>125</sup>I-labeled Bolton-Hunter reagent in plasma and urine. Proteins and salts in these physiological fluids do not seem to affect the elution profile of small molecular weight Bolton-Hunter reagent.

### Supplementary Figure 3

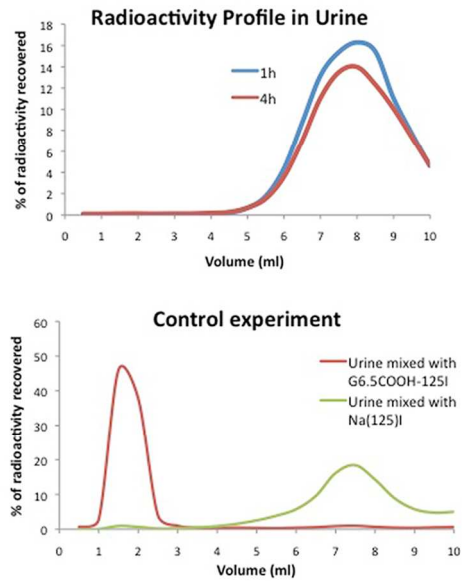

**SI – 3.** Size exclusion radioactivity profile of urine from mice orally administered with radiolabeled G6.5-COOH. Results show predominant radioactivity corresponding to small molecules was excreted in the urine. Bottom panel indicates control experiment with  $^{125}\text{I}$  and radiolabeled G6.5-COOH externally mixed with urine from mice to validate the size exclusion methods.

### Supplementary Figure 4

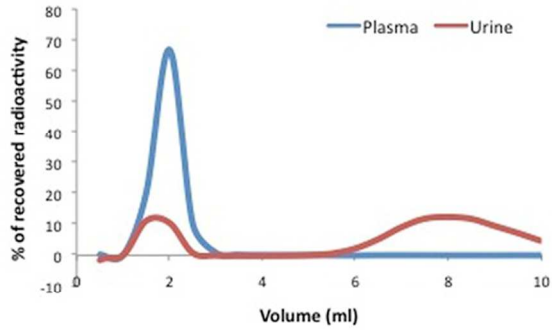

| Sample                   | Plasma Profile |         | Urine Profile |        |
|--------------------------|----------------|---------|---------------|--------|
|                          | 1.0-3.6        | 6.5-7.6 | 0.8-3.0       | 4.7-10 |
| Peak volume              | 1.0-3.6        | 6.5-7.6 | 0.8-3.0       | 4.7-10 |
| % Area under curve (AUC) | 100            | 0.0     | 23.7          | 76.3   |

**SI – 4.** Radioactivity profile in plasma of CD-1 mice intravenously injected with radiolabeled G6.5-COOH indicates no release of small molecular weight compounds in blood (blue) under in vivo conditions after 4h. The urine profile (red) shows 76.3% of the area under the curve in the small molecular weight region.

**SI- Table 1: Clinical parameters evaluated for toxicity in CD-1 mice**

| <b>Organ system</b>         | <b>Observation sign</b>                               |
|-----------------------------|-------------------------------------------------------|
| <b>Respiratory</b>          | Cyanosis: bluish appearance of tail, mouth, foot pads |
|                             | Nostril discharges: red/colorless                     |
|                             | Dyspnea: labored breathing                            |
| <b>Motor activities</b>     | Tremors: limbs /entire body                           |
|                             | Unusual locomotion/low body posture                   |
|                             | Somnolence: drowsiness                                |
| <b>Ocular signs</b>         | Lacrimation                                           |
|                             | Ptosis: dropping of upper eyelids                     |
|                             | Exophthalmos: eye protrusion                          |
| <b>Cardiovascular signs</b> | Vasodilatation: redness of skin                       |
|                             | Vasoconstriction: whitening of skin                   |
|                             | Cold body                                             |
| <b>Salivation</b>           | Hair around mouth is wet                              |
| <b>Gastrointestinal</b>     | Solid, dried, scant                                   |
| <b>Droppings</b>            | Loss of fluid, water stool                            |
| <b>Fur/skin</b>             | Ruffling                                              |
| <b>Bleeding</b>             | Evidence of bleeding from any orifice                 |
| <b>Body weight</b>          | Measured daily for 10 days                            |
